# Supplementary material for: Energy R&amp;D Trends And Sustainable Energy Strategies In IEA Countries: Efficiency, Dependency And Environmental Dynamics
Source: Research Square preprint supplement (doi:10.21203/rs.3.rs-1245869/v1), 2022-01-27
Supplement: Supplementary file 1 [file b513dc886271efb43cb07223.docx]

# **APPENDICES**

**Appendix 1. IEA Country List**

| 1 | Australia | 11 | Greece | 21 | Poland |
| --- | --- | --- | --- | --- | --- |
| 2 | Austria | 12 | Hungary | 22 | Portugal |
| 3 | Belgium | 13 | Ireland | 23 | Slovak Republic |
| 4 | Canada | 14 | Italy | 24 | Spain |
| 5 | Czech Republic | 15 | Japan | 25 | Sweden |
| 6 | Denmark | 16 | Korea, Rep. | 26 | Switzerland |
| 7 | Estonia | 17 | Luxembourg | 27 | Turkey |
| 8 | Finland | 18 | Netherlands | 28 | United Kingdom |
| 9 | France | 19 | New Zealand | 29 | United States |
| 10 | Germany | 20 | Norway |  |  |

**Appendix 2. Cross Correlations**

|  | *lnrd_total* | *e_int* | *renew_share* | *imp_dep* | *lnco2* |
| --- | --- | --- | --- | --- | --- |
| *lnrd_total* | 1 |  |  |  |  |
| *e_int* | 0.2 | 1 |  |  |  |
| *renew_share* | -0.2 | 0.0323 | 1 |  |  |
| *imp_dep* | -0 | -0.0204 | -0.6136 | 1 |  |
| *lnco2* | 0.5 | 0.5918 | -0.2761 | -0.1114 | 1 |

**Appendix 3. Cross-Sectional Dependency – Pesaran CD Test**

| *Variable* | CD-test | p-value | average joint T | mean ρ | mean abs (ρ) |
| --- | --- | --- | --- | --- | --- |
| *lnrd_total* | 28.163 | 0.00 | 17.15 | 0.31 | 0.46 |
| *residuals* | 7.468 | 0.00 | 17.15 | 0.08 | 0.37 |
| *Note*: p-values close to zero indicate data are correlated across panel groups. | | | | | |
